# Supplementary material for: Effectiveness of molnupiravir vs nirmatrelvir-ritonavir in non-hospitalised and hospitalised patients with COVID-19: a target trial emulation study
Source: PubMed Central journal article supplement — eClinicalMedicine. 2023 Sep 20;64:102225. doi: 10.1016/j.eclinm.2023.102225 (PMC10518465; doi:10.1016/j.eclinm.2023.102225), 2023-09-20
Supplement: mmc1.pdf [file mmc1.pdf]

**Supplementary Table 1. Target trial specification and emulation using observational data**

| <b>Protocol component</b> | <b>Specification</b>                                                                                                                                                                                                                                                                                                                                                                                                                                                                                                                                            | <b>Emulation using observational data</b>                                                                                                                                                                                                                                                                                                                                                                                                                                                                                                                             |
|---------------------------|-----------------------------------------------------------------------------------------------------------------------------------------------------------------------------------------------------------------------------------------------------------------------------------------------------------------------------------------------------------------------------------------------------------------------------------------------------------------------------------------------------------------------------------------------------------------|-----------------------------------------------------------------------------------------------------------------------------------------------------------------------------------------------------------------------------------------------------------------------------------------------------------------------------------------------------------------------------------------------------------------------------------------------------------------------------------------------------------------------------------------------------------------------|
| Eligible criteria         | <p>Age <math>\geq</math> 18 years, who received oral antiviral treatment within 5 days of a COVID-19 infection, during inclusion period<sup>1</sup></p> <p>Excluded patients who:</p> <ul style="list-style-type: none"> <li>- had a history of COVID-19 infection before index date</li> <li>- with contraindications to nirmatrelvir-ritonavir or molnupiravir<sup>2</sup></li> </ul> <p>The index date was defined as the date of nirmatrelvir-ritonavir or molnupiravir prescription.</p>                                                                   | <p>Same as for specification.</p> <p>Date of COVID-19 infection was ascertained by the date of first positive polymerase chain reaction or rapid antigen test result during the inclusion period.</p> <p>Patients were considered non-hospitalised when they were not hospitalised on or before the index date.</p> <p>Patients were considered hospitalised when they were admitted to hospital within 5 days before or on index date.</p> <p>Those who had a prescription of both nirmatrelvir-ritonavir or molnupiravir during the study period were excluded.</p> |
| Treatment strategy        | <p>Initiated molnupiravir<br/><i>versus</i><br/>Initiated nirmatrelvir-ritonavir</p> <p>Patients were expected to complete one full course of molnupiravir or nirmatrelvir-ritonavir according to the regimen approved by U.S. Food and Drug Administration, unless clinical conditions prevented them from completing the treatment (e.g. oral intake no longer possible, severe adverse effects).</p> <p>Physicians were allowed to prescribe other concomitant treatments (e.g. steroids) as clinically indicated for patients in both treatment groups.</p> | <p>Same as for specification.</p> <p>It was assumed that once the patient initiated COVID-19 antiviral therapy, he or she had completed the full course of COVID-19 antiviral.</p>                                                                                                                                                                                                                                                                                                                                                                                    |
| Treatment assignment      | Individuals were randomly assigned to a treatment strategy at baseline and were aware of the treatment strategy they were assigned to.                                                                                                                                                                                                                                                                                                                                                                                                                          | Randomisation of treatment assignment were emulated by propensity score matching.                                                                                                                                                                                                                                                                                                                                                                                                                                                                                     |
| Outcomes                  | <p>All-cause mortality (28-day)</p> <p>Intensive unit care admission or ventilatory support (28-day)</p> <p>Hospitalisation (28-day)</p>                                                                                                                                                                                                                                                                                                                                                                                                                        | Same as for specification.                                                                                                                                                                                                                                                                                                                                                                                                                                                                                                                                            |
| Follow-up                 | From baseline until the earliest of occurrence of outcomes, 28 days after baseline.                                                                                                                                                                                                                                                                                                                                                                                                                                                                             | Same as for specification.                                                                                                                                                                                                                                                                                                                                                                                                                                                                                                                                            |
| Statistical analysis      | Intention-to-treat analysis                                                                                                                                                                                                                                                                                                                                                                                                                                                                                                                                     | Interaction effects of treatment with baseline age, gender, vaccination status at baseline, and Charlson Comorbidity Index were tested.                                                                                                                                                                                                                                                                                                                                                                                                                               |

<sup>1</sup>Inclusion period commenced from 16 March 2022 (when both nirmatrelvir-ritonavir and molnupiravir became available in Hong Kong) to 31 December 2022 (to allow 28 days of follow-up)

<sup>2</sup>Patients with contraindications to nirmatrelvir-ritonavir include severe liver impairment (cirrhosis, hepatocellular carcinoma, or liver transplant), chronic kidney disease, and use of interacting drugs (i.e., amiodarone, apalutamide, rifampicin, rifapentine, carbamazepine, primidone, phenobarbital, or phenytoin, direct oral anticoagulants) within 90 days before index date<sup>3,4</sup>

## References

1. HKSAR Government. LCQ7: Introduction of new drugs for treating Coronavirus Disease 2019. 2022. <https://www.info.gov.hk/gia/general/202202/23/P2022022300303.htm> (accessed 16 June 2023).
2. HKSAR Government. First shipment of COVID-19 oral drug Paxlovid distributed to HA for application (with photos). 2022. <https://www.info.gov.hk/gia/general/202203/15/P2022031500280.htm> (accessed 16 June 2023).
3. U.S. Food & Drug Administration. Fact Sheet For Healthcare Providers: Emergency Use Authorization For Paxlovid. 2023. <https://www.fda.gov/media/155050/download> (accessed 16 June 2023).
4. U.S. Food & Drug Administration. Fact Sheet for Healthcare Providers: Emergency Use Authorization for Lagevrio (molnupiravir) Capsules. 2023. <https://www.fda.gov/media/155054/download> (accessed 16 June 2023).

**Supplementary Table 2. Baseline characteristics of COVID-19 patients before one-to-one propensity score matching**

| Characteristics                               | Non-hospitalised (N = 129,345)      |                           |                  | Hospitalised (N = 18,962)           |                          |                  |
|-----------------------------------------------|-------------------------------------|---------------------------|------------------|-------------------------------------|--------------------------|------------------|
|                                               | Nirmatrelvir-ritonavir (N = 96,758) | Molnupiravir (N = 32,587) | SMD <sup>†</sup> | Nirmatrelvir-ritonavir (N = 12,793) | Molnupiravir (N = 6,169) | SMD <sup>†</sup> |
| Age, year - mean (SD)                         | 63.73 (14.3)                        | 70.97 (14.1)              | 0.509            | 73.44 (15.12)                       | 75.85 (15.78)            | 0.156            |
| Sex, Male (%)                                 | 41,190 (42.6)                       | 15,591 (47.8)             | 0.106            | 6,590 (51.5)                        | 3,088 (50.1)             | 0.029            |
| Charlson Comorbidity Index - mean (SD)        | 2.43 (1.6)                          | 3.37 (1.8)                | 0.544            | 3.77 (2.01)                         | 4.24 (2.17)              | 0.221            |
| COVID-19 vaccination (%)                      |                                     |                           | 0.304            |                                     |                          | 0.235            |
| Unvaccinated                                  | 3,960 (4.1)                         | 2,380 (7.3)               |                  | 1,588 (12.4)                        | 967 (15.7)               |                  |
| 1 dose                                        | 1,208 (1.2)                         | 1,475 (4.5)               |                  | 384 (3.0)                           | 443 (7.2)                |                  |
| 2 doses                                       | 7,760 (8.0)                         | 4,088 (12.5)              |                  | 1,973 (15.4)                        | 1,028 (16.7)             |                  |
| ≥3 doses                                      | 83,830 (86.6)                       | 24,644 (75.6)             |                  | 8,848 (69.2)                        | 3,731 (60.5)             |                  |
| <b>Pre-existing comorbidities (%)</b>         |                                     |                           |                  |                                     |                          |                  |
| Cancer                                        | 4,524 (4.7)                         | 2,239 (6.9)               | 0.094            | 1,237 (9.7)                         | 602 (9.8)                | 0.003            |
| Respiratory disease                           | 2,563 (2.6)                         | 1,615 (5.0)               | 0.121            | 985 (7.7)                           | 532 (8.6)                | 0.034            |
| Diabetes                                      | 19,283 (19.9)                       | 9,396 (28.8)              | 0.209            | 3,594 (28.1)                        | 1,998 (32.4)             | 0.094            |
| Myocardial infarction                         | 586 (0.6)                           | 776 (2.4)                 | 0.147            | 250 (2.0)                           | 384 (6.2)                | 0.217            |
| Cerebrovascular disease                       | 4,413 (4.6)                         | 3,565 (10.9)              | 0.240            | 1,598 (12.5)                        | 1,229 (19.9)             | 0.203            |
| Hypertension                                  | 36,794 (38.0)                       | 16,743 (51.4)             | 0.271            | 6,544 (51.2)                        | 3,377 (54.7)             | 0.072            |
| <b>Medication use within 90 days (%)</b>      |                                     |                           |                  |                                     |                          |                  |
| Renin-angiotensin-system agents               | 20,197 (20.9)                       | 10,953 (33.6)             | 0.289            | 3,811 (29.8)                        | 2,137 (34.6)             | 0.104            |
| Beta blockers                                 | 11,248 (11.6)                       | 7,395 (22.7)              | 0.297            | 2,280 (17.8)                        | 1,558 (25.3)             | 0.182            |
| Calcium channel blockers                      | 28,757 (29.7)                       | 14,449 (44.3)             | 0.306            | 5,205 (40.7)                        | 2,813 (45.6)             | 0.099            |
| Diuretics                                     | 3,161 (3.3)                         | 2,701 (8.3)               | 0.216            | 1,112 (8.7)                         | 904 (14.7)               | 0.186            |
| Nitrates                                      | 3,114 (3.2)                         | 2,784 (8.5)               | 0.228            | 889 (6.9)                           | 729 (11.8)               | 0.168            |
| Lipid lowering agents                         | 32,538 (33.6)                       | 17,085 (52.4)             | 0.387            | 5,217 (40.8)                        | 3,114 (50.5)             | 0.196            |
| Insulins                                      | 1,734 (1.8)                         | 1,473 (4.5)               | 0.157            | 633 (4.9)                           | 546 (8.9)                | 0.154            |
| Antidiabetic drugs                            | 15,786 (16.3)                       | 8,074 (24.8)              | 0.211            | 2,846 (22.2)                        | 1,633 (26.5)             | 0.099            |
| Antiplatelets                                 | 12,302 (12.7)                       | 9,285 (28.5)              | 0.398            | 3,170 (24.8)                        | 2,322 (37.6)             | 0.280            |
| Immuno-suppressants                           | 501 (0.5)                           | 653 (2.0)                 | 0.133            | 114 (0.9)                           | 178 (2.9)                | 0.147            |
| Corticosteroids                               | 1,087 (1.1)                         | 1,136 (3.5)               | 0.158            | 693 (5.4)                           | 481 (7.8)                | 0.096            |
| Proton pump inhibitors                        | 12,472 (12.9)                       | 8,761 (26.9)              | 0.356            | 3,179 (24.8)                        | 2,424 (39.3)             | 0.313            |
| Histamine H <sub>2</sub> receptor antagonists | 15,436 (16.0)                       | 7,621 (23.4)              | 0.188            | 2,774 (21.7)                        | 1,525 (24.7)             | 0.072            |
| Tocilizumab                                   | 0 (0.0)                             | 0 (0.0)                   | <0.001           | 1 (0.0)                             | 1 (0.0)                  | 0.008            |
| Baricitinib                                   | 0 (0.0)                             | 0 (0.0)                   | <0.001           | 9 (0.1)                             | 1 (0.0)                  | 0.026            |
| Remdesivir                                    | 0 (0.0)                             | 0 (0.0)                   | <0.001           | 65 (0.5)                            | 36 (0.6)                 | 0.010            |
| Interferon beta-1b                            | 0 (0.0)                             | 0 (0.0)                   | <0.001           | 2 (0.0)                             | 2 (0.0)                  | 0.011            |

SMD=Standardised mean difference; SD=Standard deviation

Notes:

<sup>†</sup>SMD<0.1 indicates balance between groups

**Supplementary Table 3. Subgroup analysis for ICU admission or ventilatory support and hospitalisation**

| Subgroups                                   | Nirmatrelvir-ritonavir (N = 31,761) |          |                           |                                         | Non-hospitalised (N = 63,522) |          |                  |                                         | ARR (95% CI) (%)    | Adjusted HR (95% CI) <sup>†</sup> | p-value for interaction |
|---------------------------------------------|-------------------------------------|----------|---------------------------|-----------------------------------------|-------------------------------|----------|------------------|-----------------------------------------|---------------------|-----------------------------------|-------------------------|
|                                             | Molnupiravir (N = 31,761)           |          | Molnupiravir (N = 31,761) |                                         | Events                        | Rate (%) | Follow-up (days) | Incidence rate (per 10,000 person days) |                     |                                   |                         |
|                                             | Events                              | Rate (%) | Events                    | Rate (%)                                |                               |          |                  |                                         |                     |                                   |                         |
| <b>ICU admission or ventilatory support</b> |                                     |          |                           |                                         |                               |          |                  |                                         |                     |                                   |                         |
| <b>Age, years</b>                           |                                     |          |                           |                                         |                               |          |                  |                                         |                     |                                   |                         |
| <70                                         | 14                                  | 0.09     | 418,333                   | 0.33 (0.18, 0.56)                       | 13                            | 0.09     | 393,081          | 0.33 (0.18, 0.57)                       | 0.00 (-0.07, 0.07)  | 1.09 (0.51, 2.34)                 | 0.64                    |
| ≥70                                         | 57                                  | 0.34     | 468,766                   | 1.22 (0.92, 1.58)                       | 78                            | 0.44     | 491,338          | 1.59 (1.25, 1.98)                       | 0.10 (-0.03, 0.23)  | 0.95 (0.67, 1.35)                 |                         |
| <b>Sex</b>                                  |                                     |          |                           |                                         |                               |          |                  |                                         |                     |                                   |                         |
| Male                                        | 35                                  | 0.23     | 425,808                   | 0.82 (0.57, 1.14)                       | 57                            | 0.37     | 423,645          | 1.35 (1.02, 1.74)                       | 0.14 (0.02, 0.27)   | 0.74 (0.48, 1.13)                 | 0.49                    |
| Female                                      | 36                                  | 0.22     | 461,291                   | 0.78 (0.55, 1.08)                       | 34                            | 0.21     | 460,774          | 0.74 (0.51, 1.03)                       | -0.01 (-0.11, 0.09) | 1.36 (0.84, 2.21)                 |                         |
| <b>CCI</b>                                  |                                     |          |                           |                                         |                               |          |                  |                                         |                     |                                   |                         |
| 0-3                                         | 24                                  | 0.13     | 533,948                   | 0.45 (0.29, 0.67)                       | 19                            | 0.11     | 486,702          | 0.39 (0.24, 0.61)                       | -0.02 (-0.09, 0.05) | 1.22 (0.66, 2.25)                 | 0.50                    |
| ≥4                                          | 47                                  | 0.37     | 353,151                   | 1.33 (0.98, 1.77)                       | 72                            | 0.50     | 397,717          | 1.81 (1.42, 2.28)                       | 0.13 (-0.03, 0.29)  | 0.89 (0.61, 1.29)                 |                         |
| <b>COVID-19 vaccination</b>                 |                                     |          |                           |                                         |                               |          |                  |                                         |                     |                                   |                         |
| 0-1 dose                                    | 11                                  | 0.58     | 52,438                    | 2.10 (1.05, 3.75)                       | 21                            | 0.97     | 59,688           | 3.52 (2.18, 5.38)                       | 0.39 (-0.15, 0.92)  | 0.93 (0.43, 1.99)                 | 0.71                    |
| ≥2 doses                                    | 60                                  | 0.20     | 834,661                   | 0.72 (0.55, 0.93)                       | 70                            | 0.24     | 824,731          | 0.85 (0.66, 1.07)                       | 0.04 (-0.04, 0.11)  | 1.02 (0.72, 1.45)                 |                         |
| <b>Hospitalisation</b>                      |                                     |          |                           |                                         |                               |          |                  |                                         |                     |                                   |                         |
| <b>Age, years</b>                           |                                     |          |                           |                                         |                               |          |                  |                                         |                     |                                   |                         |
| <70                                         | 441                                 | 2.95     | 411,933                   | 10.71 (9.73, 11.75)                     | 695                           | 4.95     | 382,169          | 18.19 (16.86, 19.59)                    | 2.00 (1.55, 2.45)   | 0.66 (0.59, 0.75)                 | 0.017                   |
| ≥70                                         | 1,412                               | 8.40     | 443,392                   | 31.85 (30.21, 33.55)                    | 2,342                         | 13.22    | 449,724          | 52.08 (49.99, 54.23)                    | 4.82 (4.17, 5.48)   | 0.77 (0.72, 0.82)                 |                         |
| <b>Sex</b>                                  |                                     |          |                           |                                         |                               |          |                  |                                         |                     |                                   |                         |
| Male                                        | 903                                 | 5.92     | 410,484                   | 22.00 (20.59, 23.48)                    | 1,407                         | 9.25     | 399,877          | 35.19 (33.37, 37.07)                    | 3.33 (2.73, 3.92)   | 0.73 (0.67, 0.79)                 | 0.50                    |
| Female                                      | 950                                 | 5.75     | 444,841                   | 21.36 (20.02, 22.76)                    | 1,630                         | 9.85     | 432,016          | 21.36 (20.02, 22.76)                    | 4.10 (3.52, 4.68)   | 0.70 (0.65, 0.76)                 |                         |
| <b>CCI</b>                                  |                                     |          |                           |                                         |                               |          |                  |                                         |                     |                                   |                         |
| 0-3                                         | 525                                 | 2.75     | 525,319                   | 9.99 (9.16, 10.89)                      | 754                           | 4.33     | 474,051          | 15.91 (14.79, 17.08)                    | 1.58 (1.20, 1.96)   | 0.66 (0.59, 0.74)                 | 0.017                   |
| ≥4                                          | 1,328                               | 10.48    | 330,006                   | 40.24 (38.11, 42.47)                    | 2,283                         | 15.90    | 357,842          | 63.80 (61.21, 66.47)                    | 5.42 (4.62, 6.22)   | 0.76 (0.70, 0.81)                 |                         |
| <b>COVID-19 vaccination</b>                 |                                     |          |                           |                                         |                               |          |                  |                                         |                     |                                   |                         |
| 0-1 dose                                    | 224                                 | 11.88    | 48,417                    | 46.26 (40.40, 52.74)                    | 445                           | 20.45    | 52,481           | 46.26 (40.40, 52.74)                    | 8.57 (6.33, 10.80)  | 0.69 (0.58, 0.81)                 | 0.70                    |
| ≥2 doses                                    | 1,629                               | 5.45     | 806,908                   | 20.19 (19.22, 21.19)                    | 2,592                         | 8.76     | 779,412          | 33.26 (31.99, 34.56)                    | 3.31 (2.90, 3.72)   | 0.72 (0.67, 0.76)                 |                         |
| <b>Hospitalised (N = 11,784)</b>            |                                     |          |                           |                                         |                               |          |                  |                                         |                     |                                   |                         |
| Subgroups                                   | Nirmatrelvir-ritonavir (N = 5,892)  |          |                           |                                         | Molnupiravir (N = 5,892)      |          |                  |                                         | ARR (95% CI) (%)    | Adjusted HR (95% CI) <sup>†</sup> | p-value for interaction |
|                                             | Events                              | Rate (%) | Follow-up (days)          | Incidence rate (per 10,000 person days) | Events                        | Rate (%) | Follow-up (days) | Incidence rate (per 10,000 person days) |                     |                                   |                         |
| <b>ICU admission or ventilatory support</b> |                                     |          |                           |                                         |                               |          |                  |                                         |                     |                                   |                         |
| <b>Age, years</b>                           |                                     |          |                           |                                         |                               |          |                  |                                         |                     |                                   |                         |
| <70                                         | 4                                   | 0.24     | 45,911                    | 0.87 (0.24, 2.23)                       | 7                             | 0.42     | 45,458           | 1.54 (0.62, 3.17)                       | 0.18 (-0.21, 0.57)  | 0.63 (0.18, 2.27)                 | 0.32                    |
| ≥70                                         | 22                                  | 0.52     | 116,135                   | 1.89 (1.19, 2.87)                       | 17                            | 0.40     | 114,170          | 1.49 (0.87, 2.38)                       | -0.12 (-0.41, 0.17) | 1.25 (0.66, 2.37)                 |                         |
| <b>Sex</b>                                  |                                     |          |                           |                                         |                               |          |                  |                                         |                     |                                   |                         |
| Male                                        | 20                                  | 0.68     | 80,761                    | 2.48 (1.51, 3.82)                       | 17                            | 0.58     | 80,072           | 2.12 (1.24, 3.40)                       | -0.10 (-0.51, 0.30) | 1.19 (0.62, 2.28)                 | 0.63                    |
| Female                                      | 6                                   | 0.20     | 81,285                    | 0.74 (0.27, 1.61)                       | 7                             | 0.24     | 79,556           | 0.88 (0.35, 1.81)                       | 0.04 (-0.21, 0.27)  | 0.93 (0.31, 2.83)                 |                         |
| <b>CCI</b>                                  |                                     |          |                           |                                         |                               |          |                  |                                         |                     |                                   |                         |
| 0-3                                         | 4                                   | 0.19     | 57,384                    | 0.70 (0.19, 1.78)                       | 10                            | 0.54     | 51,514           | 1.94 (0.93, 3.57)                       | 0.35 (-0.04, 0.73)  | 0.38 (0.12, 1.26)                 | 0.14                    |
| ≥4                                          | 22                                  | 0.57     | 104,662                   | 2.10 (1.32, 3.18)                       | 14                            | 0.35     | 108,114          | 1.29 (0.71, 2.17)                       | -0.22 (-0.53, 0.07) | 1.56 (0.79, 3.06)                 |                         |
| <b>COVID-19 vaccination</b>                 |                                     |          |                           |                                         |                               |          |                  |                                         |                     |                                   |                         |
| 0-1 dose                                    | 7                                   | 0.81     | 23,491                    | 2.98 (1.20, 6.14)                       | 3                             | 0.35     | 22,769           | 1.32 (0.27, 3.85)                       | -0.46 (-1.17, 0.26) | 2.50 (0.62, 10.13)                | 0.24                    |
| ≥2 doses                                    | 19                                  | 0.38     | 138,555                   | 1.37 (0.83, 2.14)                       | 21                            | 0.42     | 136,859          | 1.53 (0.95, 2.35)                       | 0.04 (-0.21, 0.29)  | 0.93 (0.50, 1.73)                 |                         |

ARR=Absolute risk reduction; CI=Confidence interval; HR=Hazard ratio; CCI= Charlson Comorbidity Index; ICU=Intensive care unit

Notes: <sup>†</sup>Hazard ratios were obtained from Cox proportional hazard regression adjusted by sex, age, Charlson Comorbidity Index and vaccination status, pre-existing comorbidities, and medication use within 90 days at baseline

**Supplementary Table 4. Sensitivity analysis on the risk of outcomes for COVID-19 patients receiving nirmatrelvir-ritonavir compared with molnupiravir using within three rather than five days periods between treatment and COVID-19 infection**

| Outcomes                             | Non-hospitalised (N = 59,870)       |          |                  |                                         |                           |          |                  |                                         | ARR (95% CI) (%)    | Adjusted HR (95% CI) <sup>†</sup> |
|--------------------------------------|-------------------------------------|----------|------------------|-----------------------------------------|---------------------------|----------|------------------|-----------------------------------------|---------------------|-----------------------------------|
|                                      | Nirmatrelvir-ritonavir (N = 29,935) |          |                  |                                         | Molnupiravir (N = 29,935) |          |                  |                                         |                     |                                   |
|                                      | Events                              | Rate (%) | Follow-up (days) | Incidence rate (per 10,000 person days) | Events                    | Rate (%) | Follow-up (days) | Incidence rate (per 10,000 person days) |                     |                                   |
| <b>Effectiveness outcomes</b>        |                                     |          |                  |                                         |                           |          |                  |                                         |                     |                                   |
| All-cause mortality                  | 74                                  | 0.25     | 837,097          | 0.88 (0.69, 1.11)                       | 262                       | 0.88     | 834,704          | 3.14 (2.77, 3.54)                       | 0.63 (0.51, 0.75)   | 0.44 (0.34, 0.58)                 |
| ICU admission or ventilatory support | 72                                  | 0.24     | 835,877          | 0.86 (0.67, 1.08)                       | 86                        | 0.29     | 833,445          | 1.03 (0.83, 1.27)                       | 0.05 (-0.04, 0.13)  | 1.04 (0.76, 1.44)                 |
| Hospitalisation                      | 1,751                               | 5.85     | 805,922          | 21.73 (20.72, 22.77)                    | 2,923                     | 9.76     | 782,746          | 37.34 (36.00, 38.72)                    | 3.91 (3.49, 4.34)   | 0.70 (0.66, 0.74)                 |
|                                      | Hospitalised (N = 11,370)           |          |                  |                                         |                           |          |                  |                                         |                     |                                   |
|                                      | Nirmatrelvir-ritonavir (N = 5,685)  |          |                  |                                         | Molnupiravir (N = 5,685)  |          |                  |                                         |                     |                                   |
|                                      | Events                              | Rate (%) | Follow-up (days) | Incidence rate (per 10,000 person days) | Events                    | Rate (%) | Follow-up (days) | Incidence rate (per 10,000 person days) | ARR (95% CI) (%)    | Adjusted HR (95% CI) <sup>†</sup> |
| <b>Effectiveness outcomes</b>        |                                     |          |                  |                                         |                           |          |                  |                                         |                     |                                   |
| All-cause mortality                  | 172                                 | 3.03     | 156,630          | 10.98 (9.40, 12.75)                     | 308                       | 5.42     | 154,491          | 19.94 (17.77, 22.29)                    | 2.39 (1.65, 3.13)   | 0.61 (0.51, 0.74)                 |
| ICU admission or ventilatory support | 27                                  | 0.47     | 156,303          | 1.73 (1.14, 2.51)                       | 23                        | 0.40     | 154,185          | 1.49 (0.95, 2.24)                       | -0.07 (-0.31, 0.17) | 1.18 (0.67, 2.06)                 |

ARR=Absolute risk reduction; CI=Confidence interval; HR=Hazard ratio; ICU=Intensive care unit

Notes:

<sup>†</sup>Hazard ratios were obtained from Cox proportional hazard regression adjusted by gender, age, Charlson Comorbidity Index, vaccination status, pre-existing comorbidities, and medication use within 90 days at baseline

**Supplementary Table 5. Sensitivity analysis on the risk of outcomes for COVID-19 patients receiving nirmatrelvir-ritonavir compared with molnupiravir by excluding patients with pre-existing myocardial infarction**

| Outcomes                             | Non-hospitalised (N = 62,060)       |                  |                                         |                                         |                           |                  |                                         |                                         | ARR (95% CI) (%)   | Adjusted HR (95% CI) <sup>†</sup> |
|--------------------------------------|-------------------------------------|------------------|-----------------------------------------|-----------------------------------------|---------------------------|------------------|-----------------------------------------|-----------------------------------------|--------------------|-----------------------------------|
|                                      | Nirmatrelvir-ritonavir (N = 31,030) |                  |                                         |                                         | Molnupiravir (N = 31,030) |                  |                                         |                                         |                    |                                   |
|                                      | Events                              | Rate (%)         | Follow-up (days)                        | Incidence rate (per 10,000 person days) | Events                    | Rate (%)         | Follow-up (days)                        | Incidence rate (per 10,000 person days) |                    |                                   |
| <b>Effectiveness outcomes</b>        |                                     |                  |                                         |                                         |                           |                  |                                         |                                         |                    |                                   |
| All-cause mortality                  | 71                                  | 0.23             | 867,813                                 | 0.82 (0.64, 1.03)                       | 252                       | 0.81             | 865,456                                 | 2.91 (2.56, 3.29)                       | 0.58 (0.47, 0.70)  | 0.44 (0.33, 0.57)                 |
| ICU admission or ventilatory support | 68                                  | 0.22             | 866,622                                 | 0.78 (0.61, 0.99)                       | 86                        | 0.28             | 864,187                                 | 1.00 (0.80, 1.23)                       | 0.06 (-0.02, 0.14) | 1.00 (0.72, 1.38)                 |
| Hospitalisation                      | 1,762                               | 5.68             | 836,452                                 | 21.07 (20.09, 22.07)                    | 2,909                     | 9.37             | 813,833                                 | 35.74 (34.46, 37.07)                    | 3.69 (3.28, 4.11)  | 0.71 (0.66, 0.75)                 |
|                                      | Hospitalised (N = 11,066)           |                  |                                         |                                         |                           |                  |                                         |                                         | ARR (95% CI) (%)   | Adjusted HR (95% CI) <sup>†</sup> |
| Nirmatrelvir-ritonavir (N = 5,533)   |                                     |                  |                                         | Molnupiravir (N = 5,533)                |                           |                  |                                         |                                         |                    |                                   |
| Events                               | Rate (%)                            | Follow-up (days) | Incidence rate (per 10,000 person days) | Events                                  | Rate (%)                  | Follow-up (days) | Incidence rate (per 10,000 person days) |                                         |                    |                                   |
| <b>Effectiveness outcomes</b>        |                                     |                  |                                         |                                         |                           |                  |                                         |                                         |                    |                                   |
| All-cause mortality                  | 155                                 | 2.80             | 152,609                                 | 10.16 (8.62, 11.89)                     | 299                       | 5.40             | 150,423                                 | 19.88 (17.69, 22.26)                    | 2.60 (1.87, 3.34)  | 0.56 (0.46, 0.69)                 |
| ICU admission or ventilatory support | 19                                  | 0.34             | 152,356                                 | 1.25 (0.75, 1.95)                       | 24                        | 0.43             | 150,106                                 | 1.60 (1.02, 2.38)                       | 0.09 (-0.14, 0.32) | 0.81 (0.44, 1.48)                 |

ARR=Absolute risk reduction; CI=Confidence interval; HR=Hazard ratio; ICU=Intensive care unit

Notes:

<sup>†</sup>Hazard ratios were obtained from Cox proportional hazard regression adjusted by sex, age, Charlson Comorbidity Index and vaccination status, pre-existing comorbidities, and medication use within 90 days at baseline

**Supplementary Table 6. E-value of eligible COVID-19 patients who received nirmatrelvir-ritonavir or molnupiravir**

| <b>Outcomes</b>                      | <b>Non-hospitalised</b>            |
|--------------------------------------|------------------------------------|
|                                      | <b>Received COVID-19 treatment</b> |
| <b>Effectiveness outcomes</b>        |                                    |
| All-cause mortality                  | 4·08                               |
| ICU admission or ventilatory support | 1·16                               |
| Hospitalisation                      | 2·12                               |
|                                      | <b>Hospitalised</b>                |
|                                      | <b>Received COVID-19 treatment</b> |
| <b>Effectiveness outcomes</b>        |                                    |
| All-cause mortality                  | 2·78                               |
| ICU admission or ventilatory support | 1·40                               |

ICU=Intensive care unit
